# Supplementary material for: Subsurface geological and geophysical data from the Po Plain and the northern Adriatic Sea (north Italy)
Source: Copernicus journal article supplement (doi:10.5194/essd-15-4261-2023), 2023-09-28
Supplement: Supplementary file 1 [file essd-15-4261-2023-supplement.zip]

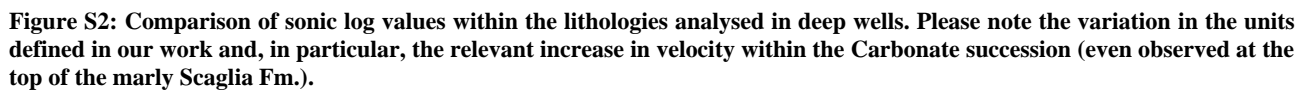

**Figure S2: Comparison of sonic log values within the lithologies analysed in deep wells. Please note the variation in the units defined in our work and, in particular, the relevant increase in velocity within the Carbonate succession (even observed at the top of the marly Scaglia Fm.).**
