# Supplementary material for: Subsurface geological and geophysical data from the Po Plain and the northern Adriatic Sea (north Italy)
Source: Copernicus journal article supplement (doi:10.5194/essd-15-4261-2023), 2023-09-28
Supplement: Supplementary file 2 [file essd-15-4261-2023-supplement.zip]

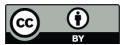

## *Supplement of*

# **Subsurface geological and geophysical data from the Po Plain and the northern Adriatic Sea (north Italy)**

**Michele Livani et al.**

*Correspondence to:* Lorenzo Petracchini (lorenzo.petracchini@cnr.it)

- [essd-15-4261-2023-supplement-title-page.pdf](#)
- [Supplementary\\_material](#)
  - [Figure S2.pdf](#)
  - [S1](#)
    - \* [interactive\\_DeltaDepth\\_Calabrian.html](#)
    - \* [interactive\\_DeltaDepth\\_CarbonateTop.html](#)
    - \* [interactive\\_DeltaDepth\\_PlioceneBase.html](#)
    - \* [interactive\\_DeltaDepth\\_Recent\\_Continental.html](#)
    - \* [interactive\\_IDW\\_Calabrian.html](#)
    - \* [interactive\\_IDW\\_CarbonateTop.html](#)
    - \* [interactive\\_IDW\\_PlioceneBase.html](#)
    - \* [interactive\\_IDW\\_Recent\\_Continental.html](#)

The copyright of individual parts of the supplement might differ from the article licence.
